# Supplementary material
Source: PubMed Central journal article supplement (PMC8008499)

**Table S1. Definitions used to identify residents with active coronary artery disease, stroke/transient ischemic attack, and/or diabetes.**

|                         | <b>Diagnosis Code Algorithm</b>                                                                                                                                                                                                                                                                                                                                                                                                                                                                                                                                                                      |                                                                                                                                                                                                                                                                                                                                                                                                                                                                                                                                                                                                 | <b>MDS indicators</b>            |
|-------------------------|------------------------------------------------------------------------------------------------------------------------------------------------------------------------------------------------------------------------------------------------------------------------------------------------------------------------------------------------------------------------------------------------------------------------------------------------------------------------------------------------------------------------------------------------------------------------------------------------------|-------------------------------------------------------------------------------------------------------------------------------------------------------------------------------------------------------------------------------------------------------------------------------------------------------------------------------------------------------------------------------------------------------------------------------------------------------------------------------------------------------------------------------------------------------------------------------------------------|----------------------------------|
| <i>Conditions</i>       | <i>Number/type of claims</i>                                                                                                                                                                                                                                                                                                                                                                                                                                                                                                                                                                         | <i>ICD-9/CPT4/HCPCS Codes</i>                                                                                                                                                                                                                                                                                                                                                                                                                                                                                                                                                                   |                                  |
| Coronary Artery Disease | At least 1 of the following claim/encounter type in the 2 years prior to admission: <ul style="list-style-type: none"> <li>- Medicare hospital inpatient</li> <li>- Medicare skilled nursing facility</li> <li>- Medicare home health</li> <li>- Medicare hospital outpatient</li> <li>- Medicare carrier</li> <li>- VA inpatient (including fee basis)</li> <li>- VA outpatient (including fee basis)</li> </ul>                                                                                                                                                                                    | DX 410.00, 410.01, 410.02, 410.10, 410.11, 410.12, 410.20, 410.21, 410.22, 410.30, 410.31, 410.32, 410.40, 410.41, 410.42, 410.50, 410.51, 410.52, 410.60, 410.61, 410.62, 410.70, 410.71, 410.72, 410.80, 410.81, 410.82, 410.90, 410.91, 410.92, 411.0, 411.1, 411.81, 411.89, 412, 413.0, 413.1, 413.9, 414.00, 414.01, 414.02, 414.03, 414.04, 414.05, 414.06, 414.07, 414.12, 414.2, 414.3, 414.4, 414.8, 414.9 ( <b>any DX on the claim</b> )                                                                                                                                             | V2.0: I1d<br>V3.0: I0400         |
| Stroke/TIA              | At least 1 of the following during the 1 year prior to admission date: <ul style="list-style-type: none"> <li>- Medicare inpatient</li> <li>- VA inpatient (including fee basis)</li> </ul> <p style="text-align: center;"><b>OR</b></p> At least 2 of the following (on different dates, if in same system) during the 1 year prior to admission date: <ul style="list-style-type: none"> <li>- Medicare outpatient</li> <li>- Medicare carrier</li> <li>- VA outpatient (including fee basis)</li> </ul>                                                                                           | DX 430, 431, 433.01, 433.11, 433.21, 433.31, 433.81, 433.91, 434.00, 434.01, 434.10, 434.11, 434.90, 434.91, 435.0, 435.1, 435.3, 435.8, 435.9, 436, 997.02 ( <b>any DX on the claim</b> )                                                                                                                                                                                                                                                                                                                                                                                                      | V2.0: I1t or I1bb<br>V3.0: I4500 |
| Diabetes                | At least 1 of the following during the 2 years prior to admission date: <ul style="list-style-type: none"> <li>- Medicare inpatient</li> <li>- Medicare skilled nursing facility</li> <li>- Medicare home health</li> <li>- VA inpatient (including fee basis)</li> </ul> <p style="text-align: center;"><b>OR</b></p> At least 2 of the following (on different dates, if in same system) during the 2 years prior to admission date: <ul style="list-style-type: none"> <li>- Medicare outpatient</li> <li>- Medicare carrier</li> <li>- VA outpatient (including fee basis)</li> <li>-</li> </ul> | DX 249.00, 249.01, 249.10, 249.11, 249.20, 249.21, 249.30, 249.31, 249.40, 249.41, 249.50, 249.51, 249.60, 249.61, 249.70, 249.71, 249.80, 249.81, 249.90, 249.91, 250.00, 250.01, 250.02, 250.03, 250.10, 250.11, 250.12, 250.13, 250.20, 250.21, 250.22, 250.23, 250.30, 250.31, 250.32, 250.33, 250.40, 250.41, 250.42, 250.43, 250.50, 250.51, 250.52, 250.53, 250.60, 250.61, 250.62, 250.63, 250.70, 250.71, 250.72, 250.73, 250.80, 250.81, 250.82, 250.83, 250.90, 250.91, 250.92, 250.93, 357.2, 362.01, 362.02, 362.03, 362.04, 362.05, 362.06, 366.41 ( <b>any DX on the claim</b> ) | V2.0: I1a<br>V3.0: I2900         |

Table S-2. VA facility complexity categorization scheme.

| Complexity Level | Description                                                                                                                                       |
|------------------|---------------------------------------------------------------------------------------------------------------------------------------------------|
| 1a               | Largest levels of volume, patient risk, teaching, research, and number and breadth of physician specialists; level 5 Intensive Care Units (ICUs). |
| 1b               | Very large levels of patient volume, risk, teaching and research; level 4 and 5 ICUs.                                                             |
| 1c               | Large levels of volume, risk, teaching, and research; level 4 ICUs.                                                                               |
| 2                | Medium patient risk, teaching, and research; level 3 and 4 ICUs.                                                                                  |
| 3                | Lowest levels of volume and patient risk; little or no teaching and research; lowest number of physician specialists; level 1 and 2 ICUs.         |

**Table S-3. Multivariable sub-distribution hazard ratios from Fine and Gray competing risk models assessing factors associated with statin discontinuation, overall and by end-of-life designation/hospice use at admission.**

|                                                                           | Full Sample<br>(n=13,110) | End-of-Life<br>Designation/<br>Hospice<br>(n=2,374) | No End-of-Life<br>Designation/<br>Hospice<br>(n=10,736) |
|---------------------------------------------------------------------------|---------------------------|-----------------------------------------------------|---------------------------------------------------------|
|                                                                           | SDHR (95% CI)             | SDHR (95% CI)                                       | SDHR (95% CI)                                           |
| <b>Socio-demographics:</b>                                                |                           |                                                     |                                                         |
| <b>Age at admission</b>                                                   |                           |                                                     |                                                         |
| 65-74                                                                     | (ref)                     | (ref)                                               | (ref)                                                   |
| 75-84                                                                     | 1.08 (0.98, 1.18)         | 1.01 (0.87, 1.18)                                   | 1.13* (1.00, 1.27)                                      |
| ≥85                                                                       | 1.17** (1.04, 1.32)       | 1.06 (0.90, 1.24)                                   | 1.24** (1.06, 1.45)                                     |
| <b>Sex</b>                                                                |                           |                                                     |                                                         |
| Male                                                                      | (ref)                     | (ref)                                               | (ref)                                                   |
| Female                                                                    | 1.06 (0.76, 1.49)         | 1.15 (0.76, 1.76)                                   | 0.99 (0.62, 1.59)                                       |
| <b>Race/ethnicity</b>                                                     |                           |                                                     |                                                         |
| White, non-Hispanic                                                       | (ref)                     | (ref)                                               | (ref)                                                   |
| Black, non-Hispanic                                                       | 0.97 (0.85, 1.11)         | 1.11 (0.90, 1.38)                                   | 0.89 (0.76, 1.05)                                       |
| Hispanic                                                                  | 0.97 (0.80, 1.18)         | 0.80 (0.57, 1.13)                                   | 1.06 (0.82, 1.36)                                       |
| Other race/ethnicity                                                      | 1.05 (0.78, 1.42)         | 1.43 (0.86, 2.38)                                   | 0.93 (0.64, 1.35)                                       |
| <b>Married</b>                                                            | 0.95 (0.84, 1.07)         | 0.96 (0.81, 1.13)                                   | 0.93 (0.79, 1.09)                                       |
| <b>Environment of Care Factors</b>                                        |                           |                                                     |                                                         |
| <b>Fiscal year of admission</b>                                           |                           |                                                     |                                                         |
| 2009-2011                                                                 | (ref)                     | (ref)                                               | (ref)                                                   |
| 2012-2015                                                                 | 0.99 (0.90, 1.10)         | 1.15 (0.99, 1.34)                                   | 0.90 (0.81, 1.01)                                       |
| <b>Living arrangement before admission</b>                                |                           |                                                     |                                                         |
| Acute hospital                                                            | (ref)                     | (ref)                                               | (ref)                                                   |
| Home/assisted living                                                      | 0.82*** (0.73, 0.91)      | 0.76** (0.64, 0.91)                                 | 0.91 (0.79, 1.04)                                       |
| Nursing home                                                              | 0.90 (0.76, 1.08)         | 0.75* (0.57, 0.99)                                  | 1.00 (0.82, 1.21)                                       |
| Other                                                                     | 0.86 (0.67, 1.11)         | 0.85 (0.61, 1.18)                                   | 0.87 (0.63, 1.21)                                       |
| <b>Next of kin relationship to the Veteran</b>                            |                           |                                                     |                                                         |
| Spouse                                                                    | (ref)                     | (ref)                                               | (ref)                                                   |
| Child                                                                     | 0.98 (0.86, 1.12)         | 1.04 (0.86, 1.26)                                   | 0.93 (0.78, 1.11)                                       |
| Sibling                                                                   | 1.06 (0.91, 1.24)         | 1.29* (1.02, 1.63)                                  | 0.88 (0.71, 1.10)                                       |
| Other relative                                                            | 1.08 (0.88, 1.33)         | 1.20 (0.89, 1.62)                                   | 0.97 (0.72, 1.29)                                       |
| Friend or other specified person of unknown relation                      | 0.96 (0.75, 1.21)         | 0.94 (0.69, 1.27)                                   | 0.93 (0.71, 1.22)                                       |
| <b>Distance from next of kin ZIP code centroid to the CLC</b>             |                           |                                                     |                                                         |
| Quartile 1 ≤ 12.9 miles                                                   | (ref)                     | (ref)                                               | (ref)                                                   |
| Quartile 2 (12.9-33.4) miles                                              | 0.98 (0.87, 1.10)         | 0.98 (0.83, 1.16)                                   | 0.97 (0.84, 1.13)                                       |
| Quartile 3 (33.4-88.9] miles                                              | 0.95 (0.84, 1.07)         | 1.02 (0.85, 1.21)                                   | 0.90 (0.77, 1.05)                                       |
| Quartile 4 >88.9 miles                                                    | 0.90 (0.79, 1.01)         | 0.88 (0.75, 1.04)                                   | 0.90 (0.76, 1.06)                                       |
| <b>Facility Characteristics</b>                                           |                           |                                                     |                                                         |
| <b>US Census region of the CLC</b>                                        |                           |                                                     |                                                         |
| Northeast                                                                 | (ref)                     | (ref)                                               | (ref)                                                   |
| Midwest                                                                   | 1.03 (0.81, 1.31)         | 1.09 (0.82, 1.45)                                   | 0.98 (0.76, 1.27)                                       |
| South                                                                     | 1.28* (1.02, 1.61)        | 1.41* (1.05, 1.89)                                  | 1.18 (0.90, 1.55)                                       |
| West                                                                      | 1.15 (0.86, 1.53)         | 1.39* (1.01, 1.92)                                  | 1.03 (0.75, 1.41)                                       |
| <b>Urban Influence Code for the CLC</b>                                   |                           |                                                     |                                                         |
| Large metro                                                               | (ref)                     | (ref)                                               | (ref)                                                   |
| Small metro                                                               | 1.00 (0.83, 1.21)         | 1.01 (0.76, 1.34)                                   | 1.02 (0.82, 1.27)                                       |
| Micropolitan                                                              | 1.04 (0.81, 1.34)         | 1.26 (0.89, 1.78)                                   | 0.94 (0.70, 1.26)                                       |
| Noncore rural                                                             | 0.91 (0.62, 1.35)         | 0.71 (0.50, 1.01)                                   | 0.98 (0.64, 1.52)                                       |
| <b>Complexity Level of the parent station</b>                             |                           |                                                     |                                                         |
| 1a (Highest)                                                              | (ref)                     | (ref)                                               | (ref)                                                   |
| 1b                                                                        | 1.00 (0.76, 1.31)         | 0.95 (0.68, 1.33)                                   | 1.04 (0.77, 1.40)                                       |
| 1c                                                                        | 1.13 (0.89, 1.42)         | 1.36 (0.94, 1.98)                                   | 0.97 (0.75, 1.26)                                       |
| 2                                                                         | 1.14 (0.89, 1.46)         | 1.05 (0.74, 1.48)                                   | 1.18 (0.87, 1.59)                                       |
| 3 (Least Complex)                                                         | 1.12 (0.89, 1.40)         | 1.17 (0.85, 1.60)                                   | 1.06 (0.82, 1.37)                                       |
| <b>Bed Size of CLC</b>                                                    |                           |                                                     |                                                         |
| <60 beds                                                                  | (ref)                     | (ref)                                               | (ref)                                                   |
| 60-120 beds                                                               | 0.92 (0.77, 1.10)         | 0.93 (0.73, 1.18)                                   | 0.91 (0.71, 1.15)                                       |
| >120 beds                                                                 | 0.83 (0.69, 1.00)         | 0.89 (0.72, 1.11)                                   | 0.79 (0.61, 1.02)                                       |
| <b>Cardiovascular Risk Factors</b>                                        |                           |                                                     |                                                         |
| <b>Number of qualifying conditions (CAD, stroke/TIA, and/or diabetes)</b> |                           |                                                     |                                                         |
| 1                                                                         | (ref)                     | (ref)                                               | (ref)                                                   |
| 2                                                                         | 1.00 (0.91, 1.09)         | 1.03 (0.92, 1.16)                                   | 0.98 (0.86, 1.11)                                       |
| 3                                                                         | 0.95 (0.84, 1.07)         | 1.15 (0.93, 1.43)                                   | 0.85 (0.71, 1.01)                                       |
| <b>Congestive heart failure</b>                                           | 0.90* (0.82, 0.99)        | 0.85* (0.75, 0.97)                                  | 0.92 (0.81, 1.04)                                       |
| <b>Hypertension</b>                                                       | 1.06 (0.87, 1.29)         | 1.15 (0.86, 1.53)                                   | 0.95 (0.76, 1.19)                                       |
| <b>Hyperlipidemia</b>                                                     | 0.95 (0.85, 1.05)         | 0.88 (0.75, 1.03)                                   | 1.00 (0.88, 1.13)                                       |
| <b>Venous thromboembolism</b>                                             | 0.97 (0.85, 1.10)         | 0.96 (0.80, 1.14)                                   | 0.97 (0.82, 1.15)                                       |
| <b>Recent myocardial infarction (past year)</b>                           | 0.91 (0.80, 1.05)         | 0.98 (0.78, 1.23)                                   | 0.89 (0.74, 1.06)                                       |

|                                                                             |                      |                     |                      |
|-----------------------------------------------------------------------------|----------------------|---------------------|----------------------|
| <b>Recent stroke/TIA (past year)</b>                                        | 0.90 (0.81, 1.01)    | 0.89 (0.74, 1.07)   | 0.94 (0.81, 1.09)    |
| <b>Current smoker</b>                                                       | 1.06 (0.92, 1.23)    | 1.07 (0.84, 1.36)   | 1.05 (0.89, 1.25)    |
| <b>Body Mass Index</b>                                                      |                      |                     |                      |
| Underweight (<18.5)                                                         | 0.97 (0.83, 1.13)    | 0.90 (0.73, 1.11)   | 1.01 (0.84, 1.23)    |
| Normal or healthy weight (18.5 to <25.0)                                    | (ref)                | (ref)               | (ref)                |
| Overweight (25.0 to <30.0)                                                  | 0.89 (0.81, 0.98)    | 0.89 (0.77, 1.04)   | 0.89* (0.80, 0.996)  |
| Obese (≥30)                                                                 | 0.77*** (0.67, 0.88) | 0.72** (0.59, 0.87) | 0.82* (0.69, 0.97)   |
| <b>Use of non-statin antilipemic medications</b>                            | 1.05 (0.91, 1.22)    | 0.97 (0.73, 1.27)   | 1.07 (0.90, 1.27)    |
| <b>Markers of Poor Prognosis</b>                                            |                      |                     |                      |
| <b>Limited prognosis documented at admission</b>                            | 3.08*** (2.73, 3.48) | (N/A)               | (N/A)                |
| <b>Advanced dementia</b>                                                    | 1.22** (1.09, 1.37)  | 1.25* (1.05, 1.48)  | 1.28** (1.10, 1.49)  |
| <b>Number of Elixhauser conditions</b>                                      |                      |                     |                      |
| 0-1                                                                         | (ref)                | (ref)               | (ref)                |
| 2-3                                                                         | 1.02 (0.88, 1.17)    | 0.93 (0.70, 1.23)   | 1.07 (0.88, 1.31)    |
| 4-5                                                                         | 1.04 (0.89, 1.22)    | 0.97 (0.73, 1.28)   | 1.10 (0.91, 1.34)    |
| >5                                                                          | 1.09 (0.92, 1.29)    | 0.99 (0.74, 1.31)   | 1.18 (0.95, 1.47)    |
| <b>Recent weight loss</b>                                                   | 1.08* (1.00, 1.17)   | 1.06 (0.95, 1.18)   | 1.14* (1.02, 1.27)   |
| <b>Poor appetite</b>                                                        | 1.17** (1.07, 1.28)  | 1.10 (0.96, 1.27)   | 1.25*** (1.12, 1.40) |
| <b>Renal failure</b>                                                        | 0.98 (0.88, 1.09)    | 1.02 (0.85, 1.22)   | 1.00 (0.87, 1.16)    |
| <b>Dehydration</b>                                                          | 1.80*** (1.34, 2.42) | 1.23 (0.85, 1.79)   | 2.54*** (1.82, 3.55) |
| <b>Acute change in mental status</b>                                        | 1.15* (1.03, 1.28)   | 1.12 (0.96, 1.30)   | 1.13 (0.97, 1.31)    |
| <b>Shortness of breath</b>                                                  | 1.03 (0.94, 1.13)    | 1.00 (0.89, 1.12)   | 1.10 (0.97, 1.25)    |
| <b>Cancer</b>                                                               | 1.28*** (1.15, 1.42) | 1.15 (0.99, 1.33)   | 1.42*** (1.25, 1.61) |
| <b>Activities of Daily Living (ADL)</b>                                     |                      |                     |                      |
| Independent, requires supervision, or requires limited assistance           | (ref)                | (ref)               | (ref)                |
| Requires extensive assistance                                               | 1.06 (0.93, 1.21)    | 1.03 (0.85, 1.25)   | 1.09 (0.94, 1.26)    |
| Dependent or totally dependent                                              | 1.28*** (1.14, 1.44) | 1.22* (1.03, 1.44)  | 1.30** (1.11, 1.52)  |
| <b>Aggressive Behavior Symptoms</b>                                         |                      |                     |                      |
| None                                                                        | (ref)                | (ref)               | (ref)                |
| Moderate                                                                    | 1.08 (0.95, 1.23)    | 0.94 (0.75, 1.17)   | 1.19* (1.01, 1.39)   |
| Severe                                                                      | 1.00 (0.81, 1.22)    | 0.96 (0.69, 1.33)   | 1.01 (0.78, 1.31)    |
| Very severe                                                                 | 1.75*** (1.29, 2.37) | 1.09 (0.63, 1.90)   | 2.05*** (1.53, 2.74) |
| <b>Presence of any pain</b>                                                 | 1.07 (0.97, 1.19)    | 1.06 (0.89, 1.26)   | 1.06 (0.95, 1.19)    |
| <b>Infection</b>                                                            | 1.03 (0.94, 1.13)    | 0.91 (0.78, 1.06)   | 1.13* (1.02, 1.26)   |
| <b>Any swallowing difficulty or altered diet</b>                            | 1.10* (1.02, 1.18)   | 1.13 (0.99, 1.29)   | 1.07 (0.98, 1.18)    |
| <b>History of falls, hip fracture, and other fractures in past 180 days</b> | 0.96 (0.89, 1.04)    | 0.99 (0.89, 1.10)   | 0.93 (0.84, 1.04)    |
| <b>Total number of medication classes at admission</b>                      |                      |                     |                      |
| <10                                                                         | (ref)                | (ref)               | (ref)                |
| 10 to <15                                                                   | 1.08 (0.96, 1.22)    | 1.15 (0.98, 1.36)   | 1.04 (0.87, 1.23)    |
| ≥15                                                                         | 1.17* (1.03, 1.34)   | 1.23* (1.01, 1.49)  | 1.14 (0.95, 1.36)    |

\*p<.05, \*\*p<.01, \*\*\*p<.001

CLC=Community Living Center, CAD=coronary artery disease, TIA = transient ischemic attack

**Table S-4. Sensitivity Analysis: Multivariable sub-distribution hazard ratios from Fine and Gray competing risk models assessing factors associated with statin discontinuation, overall and by whether patients had an end-of-life designation or hospice use at admission at admission, using alternative statin discontinuation variable requiring a 30-day gap in statin use. Associations which differed statistically from primary analyses are presented in bold, italicized, and underlined text.**

|                                                                           | Full Sample<br>(n=8,968) | End-of-Life<br>Designation/Hospice<br>(n=1,504) | No End-of-Life<br>Designation/Hospice<br>(n=7,464) |
|---------------------------------------------------------------------------|--------------------------|-------------------------------------------------|----------------------------------------------------|
|                                                                           | SDHR (95% CI)            | SDHR (95% CI)                                   | SDHR (95% CI)                                      |
| <b>Socio-demographics:</b>                                                |                          |                                                 |                                                    |
| <b>Age at admission</b>                                                   |                          |                                                 |                                                    |
| 65-74                                                                     | (ref)                    | (ref)                                           | (ref)                                              |
| 75-84                                                                     | 1.17* (1.02, 1.33)       | 1.09 (0.89, 1.34)                               | 1.20* (1.03, 1.41)                                 |
| ≥85                                                                       | 1.24** (1.06, 1.46)      | 0.99 (0.79, 1.24)                               | 1.38** (1.14, 1.68)                                |
| <b>Sex</b>                                                                |                          |                                                 |                                                    |
| Male                                                                      | (ref)                    | (ref)                                           | (ref)                                              |
| Female                                                                    | 0.88 (0.53, 1.45)        | 1.03 (0.53, 2.00)                               | 0.75 (0.37, 1.54)                                  |
| <b>Race/ethnicity</b>                                                     |                          |                                                 |                                                    |
| White, non-Hispanic                                                       | (ref)                    | (ref)                                           | (ref)                                              |
| Black, non-Hispanic                                                       | 0.98 (0.82, 1.18)        | 1.10 (0.85, 1.42)                               | 0.92 (0.75, 1.12)                                  |
| Hispanic                                                                  | 0.98 (0.78, 1.23)        | 0.92 (0.55, 1.54)                               | 1.05 (0.76, 1.45)                                  |
| Other race/ethnicity                                                      | 1.08 (0.76, 1.53)        | 1.17 (0.57, 2.39)                               | 1.10 (0.73, 1.64)                                  |
| <b>Married</b>                                                            |                          |                                                 |                                                    |
|                                                                           | 0.88 (0.75, 1.02)        | 0.85 (0.66, 1.08)                               | 0.88 (0.73, 1.07)                                  |
| <b>Environment of Care Factors</b>                                        |                          |                                                 |                                                    |
| <b>Fiscal year of admission</b>                                           |                          |                                                 |                                                    |
| 2009-2011                                                                 | (ref)                    | (ref)                                           | (ref)                                              |
| 2012-2015                                                                 | 0.99 (0.87, 1.11)        | 1.16 (0.97, 1.39)                               | 0.90 (0.78, 1.05)                                  |
| <b>Living arrangement before admission</b>                                |                          |                                                 |                                                    |
| Acute hospital                                                            | (ref)                    | (ref)                                           | (ref)                                              |
| Home/assisted living                                                      | 0.89 (0.77, 1.02)        | <b><u>0.83 (0.65, 1.05)</u></b>                 | 0.99 (0.83, 1.19)                                  |
| Nursing home                                                              | 0.94 (0.78, 1.14)        | <b><u>0.88 (0.63, 1.24)</u></b>                 | 1.00 (0.80, 1.25)                                  |
| Other                                                                     | 0.85 (0.62, 1.16)        | <b><u>0.71 (0.42, 1.20)</u></b>                 | 0.94 (0.66, 1.35)                                  |
| <b>Next of kin relationship to the Veteran</b>                            |                          |                                                 |                                                    |
| Spouse                                                                    | (ref)                    | (ref)                                           | (ref)                                              |
| Child                                                                     | 0.93 (0.77, 1.12)        | 0.97 (0.71, 1.31)                               | 0.90 (0.71, 1.13)                                  |
| Sibling                                                                   | 0.98 (0.80, 1.20)        | <b><u>1.11 (0.81, 1.53)</u></b>                 | 0.86 (0.65, 1.15)                                  |
| Other relative                                                            | 0.91 (0.71, 1.16)        | 1.08 (0.69, 1.67)                               | 0.80 (0.58, 1.11)                                  |
| Friend or other specified person of unknown relation                      | 0.88 (0.68, 1.14)        | 0.81 (0.55, 1.18)                               | 0.91 (0.67, 1.23)                                  |
| <b>Distance from next of kin ZIP code centroid to the CLC</b>             |                          |                                                 |                                                    |
| Quartile 1 ≤ 12.9 miles                                                   | (ref)                    | (ref)                                           | (ref)                                              |
| Quartile 2 (12.9-33.4) miles                                              | 0.97 (0.85, 1.11)        | 0.98 (0.79, 1.21)                               | 0.95 (0.81, 1.12)                                  |
| Quartile 3 (33.4-88.9] miles                                              | 0.96 (0.84, 1.09)        | 1.06 (0.83, 1.36)                               | 0.86 (0.72, 1.04)                                  |
| Quartile 4 >88.9 miles                                                    | 0.88 (0.76, 1.02)        | 0.90 (0.71, 1.14)                               | 0.86 (0.70, 1.05)                                  |
| <b>Facility Characteristics</b>                                           |                          |                                                 |                                                    |
| <b>US Census region of the CLC</b>                                        |                          |                                                 |                                                    |
| Northeast                                                                 | (ref)                    | (ref)                                           | (ref)                                              |
| Midwest                                                                   | 0.92 (0.71, 1.20)        | 0.83 (0.60, 1.15)                               | 0.97 (0.71, 1.32)                                  |
| <b><u>South</u></b>                                                       | 1.13 (0.88, 1.45)        | <b><u>1.10 (0.80, 1.52)</u></b>                 | 1.16 (0.84, 1.60)                                  |
| <b><u>West</u></b>                                                        | 1.02 (0.76, 1.37)        | <b><u>1.05 (0.76, 1.46)</u></b>                 | 1.05 (0.74, 1.49)                                  |
| <b>Urban Influence Code for the CLC</b>                                   |                          |                                                 |                                                    |
| Large metro                                                               | (ref)                    | (ref)                                           | (ref)                                              |
| Small metro                                                               | 1.14 (0.91, 1.41)        | 1.28 (0.94, 1.74)                               | 1.06 (0.81, 1.39)                                  |
| Micropolitan                                                              | 1.07 (0.79, 1.44)        | 1.23 (0.83, 1.82)                               | 0.98 (0.69, 1.38)                                  |
| Noncore rural                                                             | 1.07 (0.71, 1.61)        | 0.92 (0.63, 1.32)                               | 1.09 (0.68, 1.77)                                  |
| <b>Complexity Level of the parent station</b>                             |                          |                                                 |                                                    |
| 1a (Highest)                                                              | (ref)                    | (ref)                                           | (ref)                                              |
| 1b                                                                        | 1.09 (0.82, 1.44)        | 0.98 (0.70, 1.38)                               | 1.16 (0.84, 1.60)                                  |
| 1c                                                                        | 1.05 (0.82, 1.36)        | 1.24 (0.84, 1.82)                               | 0.97 (0.71, 1.32)                                  |
| 2                                                                         | 1.14 (0.86, 1.49)        | 1.23 (0.83, 1.83)                               | 1.09 (0.77, 1.55)                                  |
| 3 (Least Complex)                                                         | 0.98 (0.76, 1.26)        | 1.00 (0.73, 1.38)                               | 0.98 (0.72, 1.33)                                  |
| <b>Bed Size of CLC</b>                                                    |                          |                                                 |                                                    |
| <60 beds                                                                  | (ref)                    | (ref)                                           | (ref)                                              |
| 60-120 beds                                                               | 1.00 (0.82, 1.24)        | 1.16 (0.87, 1.55)                               | 0.91 (0.69, 1.20)                                  |
| <b><u>&gt;120 beds</u></b>                                                | 0.87 (0.69, 1.09)        | 1.03 (0.78, 1.38)                               | <b><u>0.75* (0.56, 0.995)</u></b>                  |
| <b>Cardiovascular Risk Factors</b>                                        |                          |                                                 |                                                    |
| <b>Number of qualifying conditions (CAD, stroke/TIA, and/or diabetes)</b> |                          |                                                 |                                                    |
| One                                                                       | (ref)                    | (ref)                                           | (ref)                                              |
| Two                                                                       | 0.98 (0.88, 1.10)        | 1.07 (0.92, 1.24)                               | 0.95 (0.81, 1.12)                                  |
| Three                                                                     | 0.88 (0.73, 1.05)        | 0.87 (0.63, 1.18)                               | 0.87 (0.69, 1.09)                                  |
| <b><u>Congestive heart failure</u></b>                                    | 0.94 (0.84, 1.04)        | <b><u>0.92 (0.78, 1.09)</u></b>                 | 0.93 (0.81, 1.06)                                  |
| <b>Hypertension</b>                                                       | 1.08 (0.86, 1.37)        | 1.19 (0.82, 1.72)                               | 1.00 (0.76, 1.34)                                  |

|                                                                             |                                   |                                   |                                 |
|-----------------------------------------------------------------------------|-----------------------------------|-----------------------------------|---------------------------------|
| <b><u>Hyperlipidemia</u></b>                                                | 0.92 (0.82, 1.03)                 | <b><u>0.81* (0.68, 0.97)</u></b>  | 0.99 (0.85, 1.16)               |
| <b>Venous thromboembolism</b>                                               | 1.03 (0.88, 1.20)                 | 1.01 (0.80, 1.26)                 | 1.04 (0.87, 1.24)               |
| <b>Recent myocardial infarction (past year)</b>                             | 0.81 (0.65, 1.01)                 | 0.90 (0.65, 1.25)                 | 0.76 (0.58, 1.00)               |
| <b>Recent stroke/TIA (past year)</b>                                        | 0.96 (0.84, 1.11)                 | 1.04 (0.83, 1.31)                 | 0.98 (0.82, 1.18)               |
| <b>Current smoker</b>                                                       | 1.06 (0.88, 1.27)                 | 1.03 (0.79, 1.35)                 | 1.05 (0.84, 1.31)               |
| <b>Body Mass Index</b>                                                      |                                   |                                   |                                 |
| Underweight (<18.5)                                                         | 1.02 (0.84, 1.23)                 | 1.01 (0.78, 1.32)                 | 0.99 (0.74, 1.32)               |
| Normal or healthy weight (18.5 to <25.0)                                    | (ref)                             | (ref)                             | (ref)                           |
| Overweight (25.0 to <30.0)                                                  | <b><u>0.87* (0.78, 0.97)</u></b>  | <b><u>0.80* (0.66, 0.97)</u></b>  | 0.92 (0.81, 1.06)               |
| Obese (≥30)                                                                 | <b><u>0.76** (0.63, 0.90)</u></b> | 0.56*** (0.43, 0.74)              | 0.89 (0.72, 1.10)               |
| <b><u>Use of non-statin anti-lipemic medications</u></b>                    | 1.24* (1.02, 1.52)                | <b><u>1.45* (1.02, 2.07)</u></b>  | 1.16 (0.93, 1.44)               |
| <b><u>Markers of Poor Prognosis</u></b>                                     |                                   |                                   |                                 |
| <b>Limited prognosis documented at admission</b>                            | 3.17*** (2.74, 3.66)              | (N/A)                             | (N/A)                           |
| <b>Advanced dementia</b>                                                    | 1.31*** (1.13, 1.51)              | 1.27 (1.01, 1.59)                 | 1.41*** (1.17, 1.70)            |
| <b>Number of Elixhauser conditions</b>                                      |                                   |                                   |                                 |
| 0-1                                                                         | (ref)                             | (ref)                             | (ref)                           |
| 2-3                                                                         | 1.02 (0.83, 1.26)                 | 0.88 (0.59, 1.32)                 | 1.07 (0.82, 1.39)               |
| 4-5                                                                         | 1.06 (0.85, 1.31)                 | 0.86 (0.59, 1.25)                 | 1.18 (0.92, 1.52)               |
| >5                                                                          | 1.08 (0.86, 1.35)                 | 0.88 (0.59, 1.33)                 | 1.20 (0.92, 1.56)               |
| <b>Recent weight loss</b>                                                   | 1.04 (0.94, 1.14)                 | 0.94 (0.80, 1.10)                 | 1.14* (1.00, 1.30)              |
| <b><u>Poor appetite</u></b>                                                 | 1.23*** (1.10, 1.37)              | <b><u>1.18* (1.00, 1.38)</u></b>  | 1.31*** (1.14, 1.49)            |
| <b>Renal failure</b>                                                        | 0.94 (0.83, 1.06)                 | 1.05 (0.85, 1.30)                 | 0.95 (0.80, 1.14)               |
| <b>Dehydration</b>                                                          | 2.50*** (1.78, 3.51)              | 1.86 (1.05, 3.28)                 | 2.86*** (1.90, 4.32)            |
| <b><u>Acute change in mental status</u></b>                                 | 1.29** (1.11, 1.49)               | <b><u>1.38** (1.09, 1.76)</u></b> | 1.20 (0.97, 1.47)               |
| <b>Shortness of breath</b>                                                  | 1.08 (0.96, 1.22)                 | 1.08 (0.93, 1.26)                 | 1.14 (0.97, 1.36)               |
| <b>Cancer</b>                                                               | 1.23** (1.08, 1.40)               | 1.06 (0.86, 1.30)                 | 1.40*** (1.20, 1.64)            |
| <b>Activities of Daily Living (ADL)</b>                                     |                                   |                                   |                                 |
| Independent, requires supervision, or requires limited assistance           | (ref)                             | (ref)                             | (ref)                           |
| Requires extensive assistance                                               | 1.01 (0.85, 1.19)                 | 1.02 (0.78, 1.33)                 | 1.06 (0.88, 1.27)               |
| Dependent or totally dependent                                              | 1.26** (1.09, 1.45)               | 1.29* (1.04, 1.59)                | 1.25* (1.03, 1.52)              |
| <b>Aggressive Behavior Symptoms</b>                                         |                                   |                                   |                                 |
| None                                                                        | (ref)                             | (ref)                             | (ref)                           |
| <b><u>Moderate</u></b>                                                      | 1.00 (0.85, 1.17)                 | <b><u>0.73* (0.53, 0.99)</u></b>  | 1.16 (0.97, 1.39)               |
| Severe                                                                      | 0.93 (0.72, 1.19)                 | 0.97 (0.64, 1.47)                 | 0.91 (0.68, 1.21)               |
| Very severe                                                                 | 1.70** (1.23, 2.37)               | 0.58 (0.24, 1.38)                 | 2.11*** (1.53, 2.90)            |
| <b>Presence of any pain</b>                                                 | 1.07 (0.96, 1.20)                 | 1.16 (0.95, 1.42)                 | 1.02 (0.89, 1.16)               |
| <b><u>Infection</u></b>                                                     | 0.98 (0.87, 1.10)                 | <b><u>0.80* (0.65, 0.98)</u></b>  | <b><u>1.11 (0.96, 1.28)</u></b> |
| <b>Any swallowing difficulty or altered diet</b>                            | 1.03 (0.92, 1.14)                 | 1.12 (0.91, 1.37)                 | 0.97 (0.87, 1.09)               |
| <b>History of falls, hip fracture, and other fractures in past 180 days</b> | 0.93 (0.84, 1.02)                 | 0.91 (0.77, 1.07)                 | 0.93 (0.82, 1.06)               |
| <b>Total Number of Medication Classes at Admission</b>                      |                                   |                                   |                                 |
| <10                                                                         | (ref)                             | (ref)                             | (ref)                           |
| 10 to <15                                                                   | 0.99 (0.85, 1.16)                 | 1.09 (0.88, 1.34)                 | 0.94 (0.76, 1.16)               |
| ≥15                                                                         | 1.10 (0.93, 1.31)                 | 1.16 (0.89, 1.51)                 | 1.06 (0.84, 1.33)               |

\*p<.05, \*\*p<.01, p<.001

CLC=Community Living Center, CAD=coronary artery disease, TIA = transient ischemic attack

### **Summary of differences in hazard model results when using a 30-day vs. 14-day definition of statin discontinuation:**

In residents without EOL designation/hospice, results were substantively unchanged, although a few associations became statistically not significant even though the magnitude of effect sizes were similar. However, some results changed substantively for residents with EOL designation/hospice. Of note, significant associations previously seen for admission from home/assisted living or nursing home, sibling next-of-kin, census region, and total number of medications at admission were attenuated and became non-significant. Several factors not significant in the main analysis became statistically significant: hyperlipidemia diagnosis (SDHR=0.81, 95% CI=0.68-0.97), being overweight (SDHR=0.80, 95% CI=0.66-0.97), use of non-statin anti-lipemics (SDHR=1.45, 95% CI=1.02, 2.07), poor appetite (SDHR=1.18, 95% CI=1.00-1.38), acute change in mental status (SDHR=1.38, 95% CI=1.09-1.76), moderate aggressive behavior (SDHR=0.72, 95% CI=0.53-0.99), and infection (SDHR=0.80, 95% CI=0.65-0.98).

**Figure S-1. Construction of the sample of Veteran Community Living Center (CLC) stays for residents with limited life expectancy and/or advanced dementia (LLE/AD).**

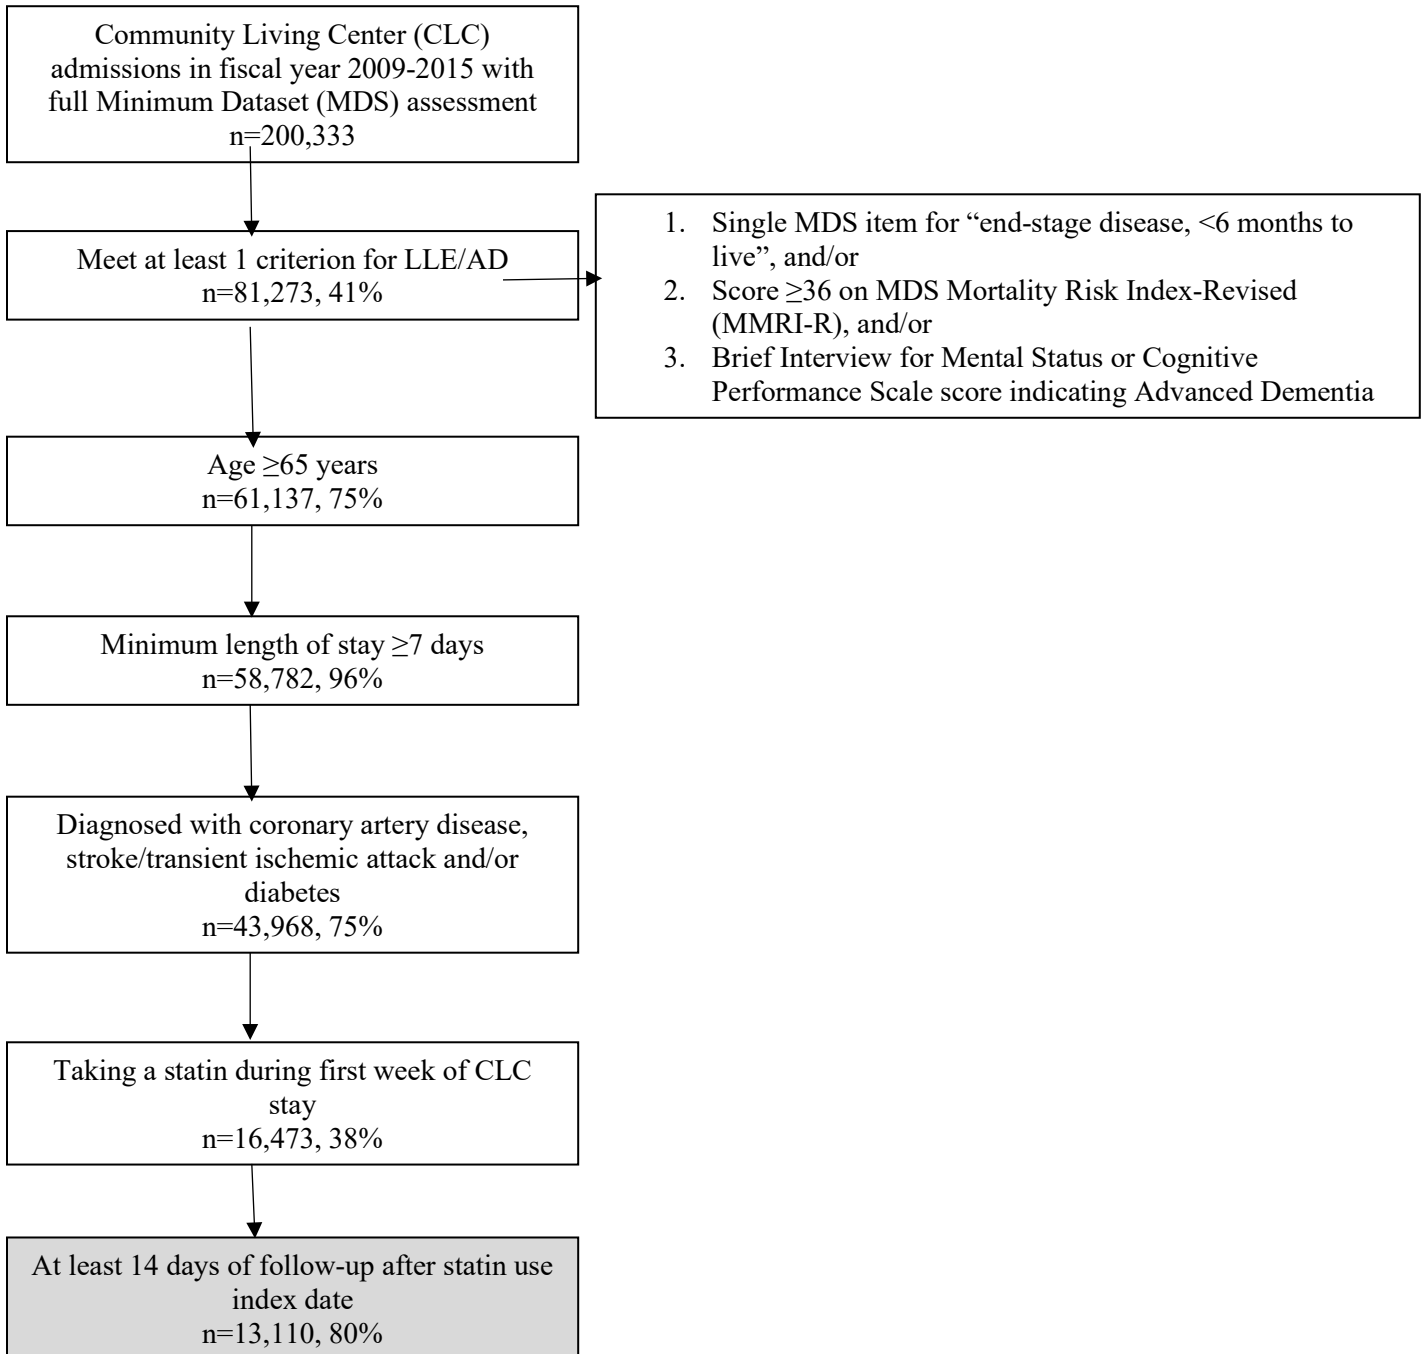

Figure S-2. Cumulative incidence of statin discontinuation, using primary statin discontinuation definition requiring a 14-day gap in statin use.

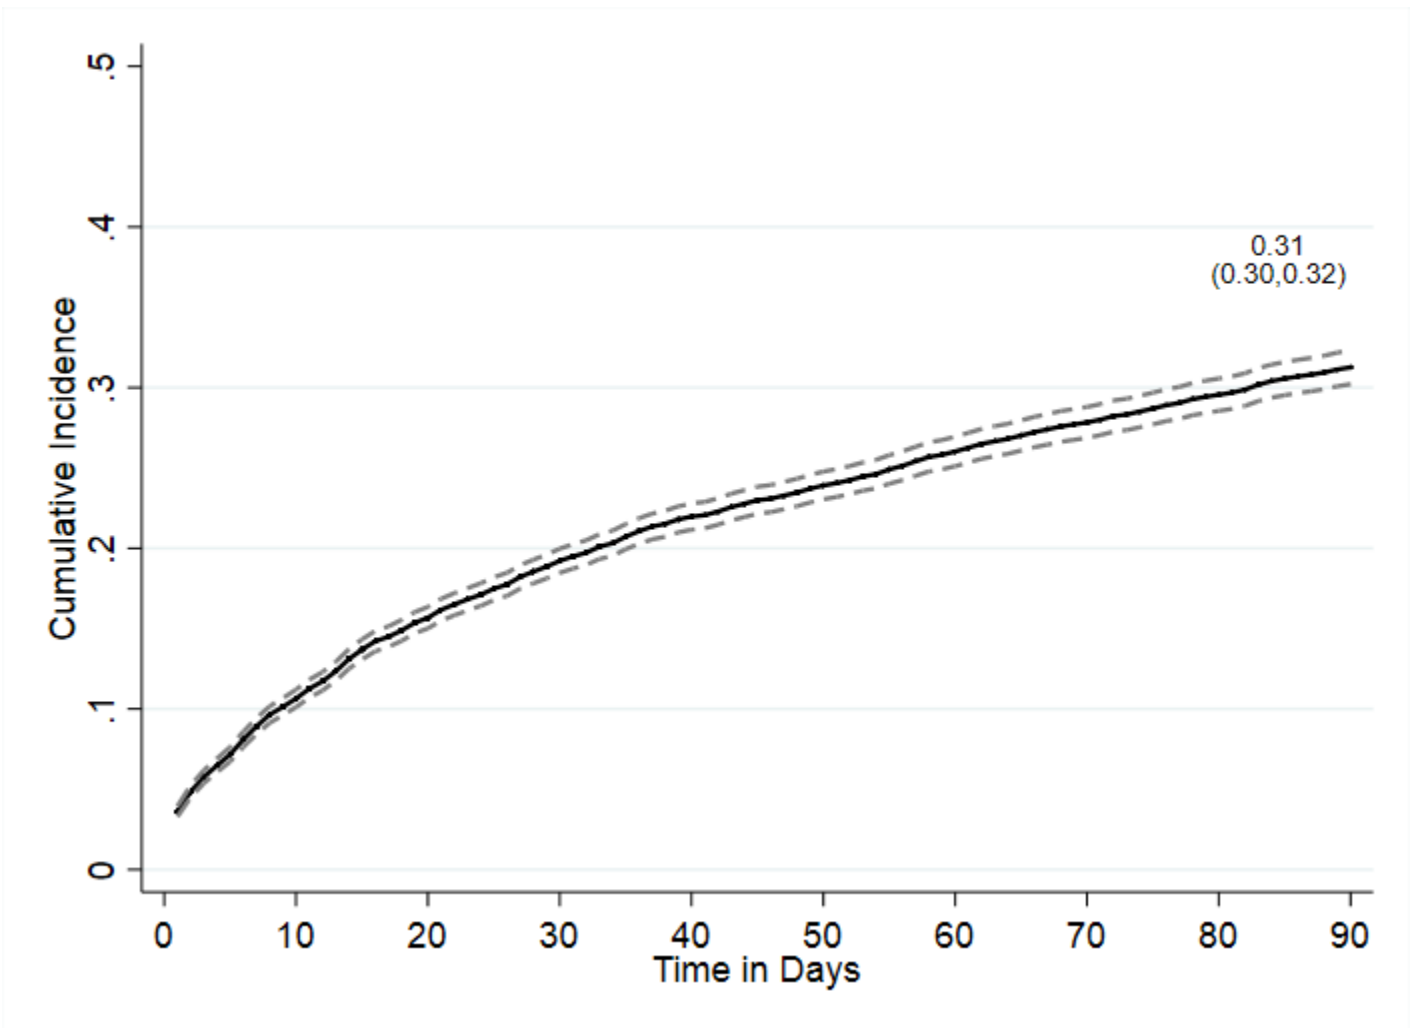



Figure S-3. Cumulative incidence of statin discontinuation, using alternative statin discontinuation definition requiring a 30-day gap in statin use.

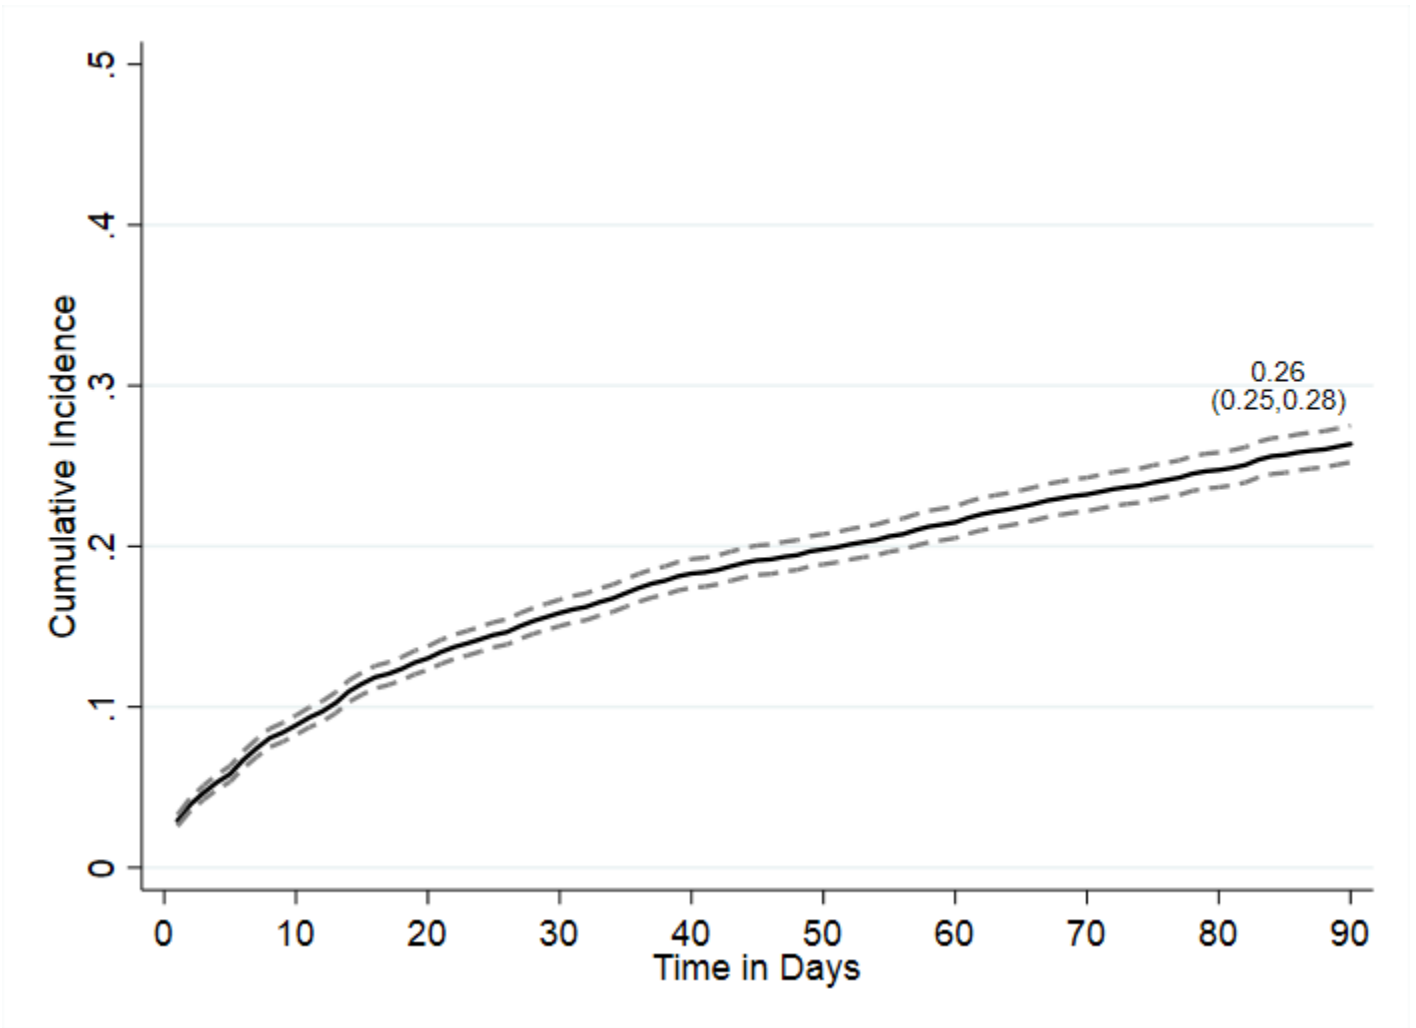

Figure S-4. Cumulative incidence of statin discontinuation, using alternative statin discontinuation variable requiring a 30-day gap in statin use, stratified by end-of-life designation/hospice use at admission.

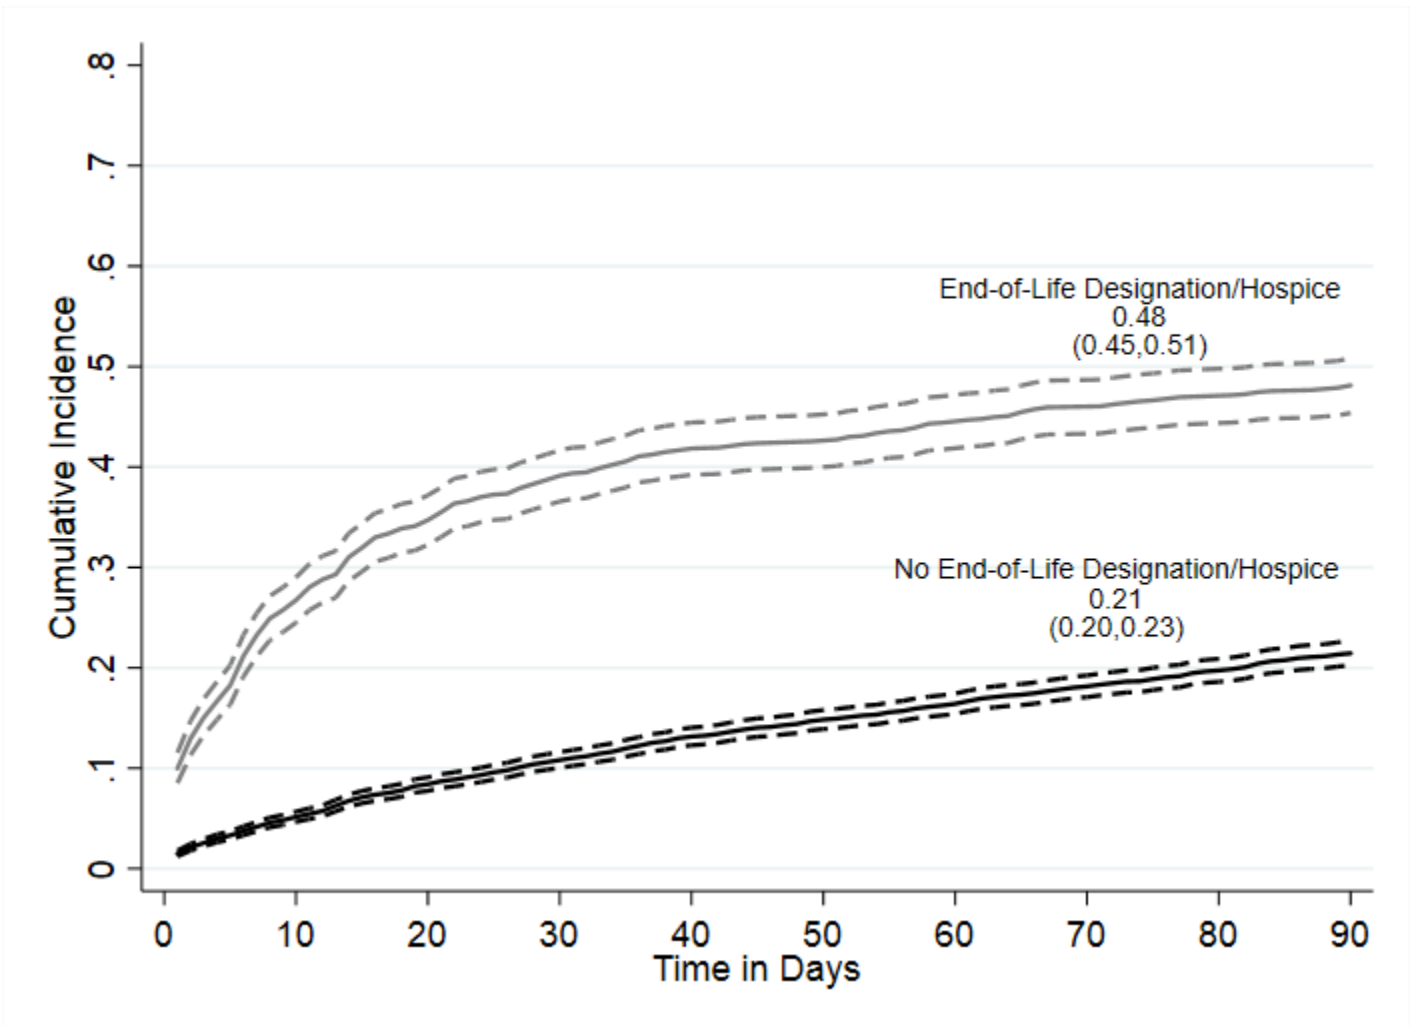

Supplement: NIHMS1678845-supplement-Supplemental_Material.pdf [file NIHMS1678845-supplement-Supplemental_Material.pdf]
